# Supplementary material
Source: PubMed Central journal article supplement (PMC2865563)

# Supplemental Fig. 1 / Fang MZ

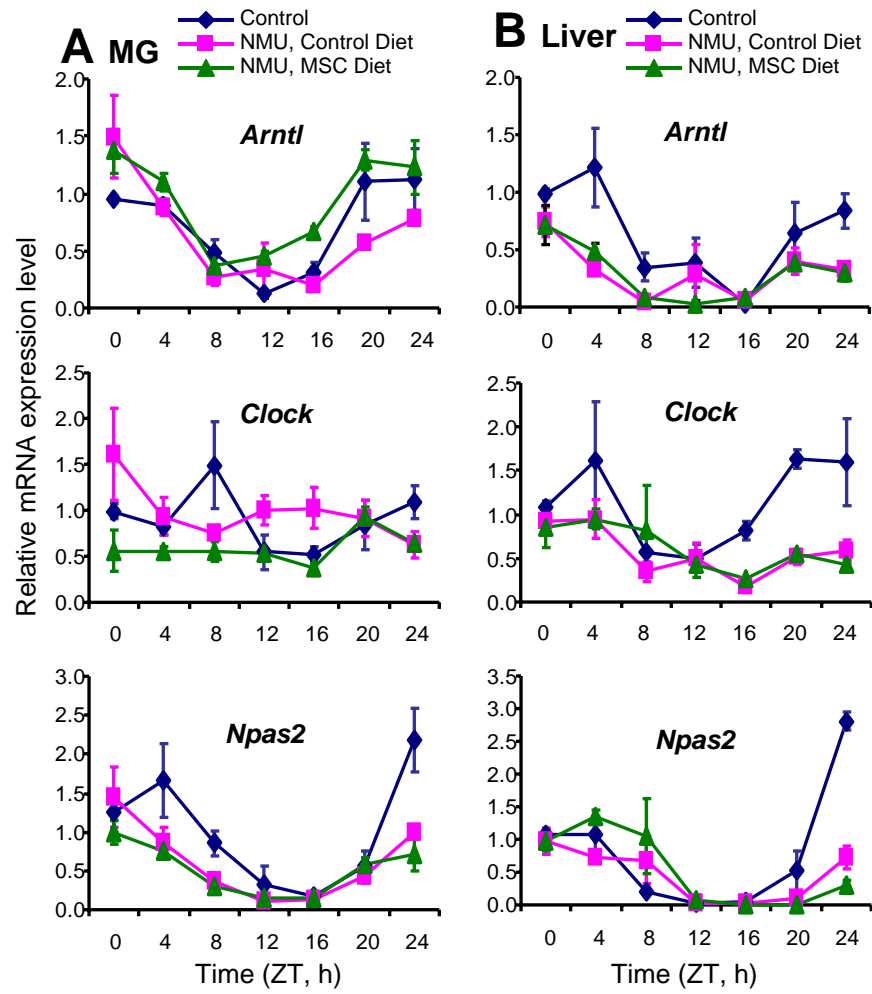

Supplement: NIHMS181679-supplement-1.pdf [file NIHMS181679-supplement-1.pdf]
